# Supplementary material for: Effects of particulate air pollution on blood pressure in a highly exposed population in Beijing, China: a repeated-measure study
Source: Springer Nature journal article supplement (doi:10.1186/1476-069x-10-108), 2011-12-01
Supplement: Additional file 1 [file 1476-069x-10-108-s1.docx]

**Table S1. Stratified analyses by current smoking on all subjects (office workers and truck drivers)a**

|  |  |  | **All Subjects  (obs=240b)** | | |  | **Current non-smokers (obs=146c)** | | |  | **Current smokers  (obs=94d)** | | |
| --- | --- | --- | --- | --- | --- | --- | --- | --- | --- | --- | --- | --- | --- |
|  |  |  | β | (95%CI) | p-value |  | β | (95%CI) | p-value |  | β | (95%CI) | p-value |
|  |  |  |  |  |  |  |  |  |  |  |  |  |  |
| **Systolic blood pressure (mmHg)** | | | | | | | | | | | | | |
|  | Personal PM2.5 (work hours) |  | -0.01 | (-0.18;0.17) | 0.94 |  | 0.08 | (-0.26;0.41) | 0.64 |  | -0.04 | (-0.25;0.16) | 0.66 |
|  | Personal EC (work hours) |  | -0.29 | (-2.32;1.73) | 0.77 |  | -0.78 | (-3.72;2.16) | 0.60 |  | -0.95 | (-4.01;2.11) | 0.53 |
|  | Ambient PM10  (1-day mean) |  | 0.20 | (-0.05;0.45) | 0.11 |  | 0.10 | (-0.26;0.46) | 0.58 |  | 0.19 | (-0.12;0.49) | 0.22 |
|  | Ambient PM10  (2-day mean) |  | 0.26 | (-0.08;0.59) | 0.14 |  | 0.06 | (-0.44;0.56) | 0.81 |  | 0.06 | (-0.38;0.50) | 0.77 |
|  | Ambient PM10  (5-day mean) |  | 0.63 | (0.09;1.16) | 0.02 |  | 0.16 | (-0.61;0.92) | 0.69 |  | 0.51 | (0.17;1.18) | 0.14 |
|  | Ambient PM10  (8-day mean) |  | 0.98 | (0.34;1.61) | 0.003 |  | 0.33 | (-0.61;1.26) | 0.49 |  | 0.72 | (0.07;1.51) | 0.07 |
| **Diastolic blood pressure (mmHg)** | | | | | | | | | | | | | |
|  | Personal PM2.5 (work hours) |  | 0.04 | (-0.11;0.19) | 0.57 |  | 0.17 | (-0.10;0.45) | 0.22 |  | 0.04 | (-0.12;0.20) | 0.63 |
|  | Personal EC (work hours) |  | -1.26 | (-2.94;0.43) | 0.14 |  | -1.26 | (-3.82;1.29) | 0.33 |  | -1.19 | (-3.59;1.22) | 0.32 |
|  | Ambient PM10  (1-day mean) |  | 0.18 | (-0.03;0.39) | 0.09 |  | 0.25 | (-0.07;0.56) | 0.13 |  | 0.22 | (-0.17;0.61) | 0.26 |
|  | Ambient PM10  (2-day mean) |  | 0.17 | (-0.11;0.46) | 0.23 |  | 0.29 | (-0.15;0.73) | 0.19 |  | 0.24 | (-0.33;0.80) | 0.40 |
|  | Ambient PM10  (5-day mean) |  | 0.50 | (0.06;0.95) | 0.03 |  | 0.54 | (-0.10;1.18) | 0.09 |  | 0.89 | (0.04;1.74) | 0.04 |
|  | Ambient PM10  (8-day mean) |  | 0.71 | (0.18;1.24) | 0.01 |  | 0.85 | (0.08;1.63) | 0.03 |  | 1.55 | (0.59;2.51) | 0.002 |
| **Mean arterial pressure (mmHg)** | | | | | | | | | | | | | |
|  | Personal PM2.5 (work hours) |  | 0.03 | (-0.11;0.17) | 0.66 |  | 0.14 | (-0.12;0.40) | 0.29 |  | 0.02 | (-0.14;0.17) | 0.81 |
|  | Personal EC (work hours) |  | -0.94 | (-2.52;0.63) | 0.24 |  | -1.35 | (-3.68;0.99) | 0.25 |  | -0.92 | (-3.23;1.40) | 0.43 |
|  | Ambient PM10  (1-day mean) |  | 0.20 | (0.01;0.39) | 0.04 |  | 0.22 | (-0.08;0.51) | 0.14 |  | 0.20 | (-0.09;0.50) | 0.17 |
|  | Ambient PM10  (2-day mean) |  | 0.20 | (-0.07;0.46) | 0.14 |  | 0.21 | (-0.19;0.62) | 0.29 |  | 0.13 | (-0.30;0.55) | 0.56 |
|  | Ambient PM10  (5-day mean) |  | 0.55 | (0.13;0.96) | 0.01 |  | 0.40 | (-0.20;0.99) | 0.19 |  | 0.65 | (0.00;1.30) | 0.05 |
|  | Ambient PM10  (8-day mean) |  | 0.81 | (0.31;1.30) | 0.002 |  | 0.69 | (-0.04;1.42) | 0.06 |  | 1.02 | (0.27;1.77) | 0.01 |
| **Pulse pressure (mmHg)** | | | | | | | | | | | | | |
|  | Personal PM2.5 (work hours) |  | -0.06 | (-0.22;0.10) | 0.49 |  | -0.04 | (-0.34;0.27) | 0.80 |  | -0.09 | (-0.28;0.09) | 0.30 |
|  | Personal EC (work hours) |  | 0.75 | (-1.1;2.6) | 0.42 |  | 0.49 | (-2.38;3.35) | 0.73 |  | -0.06 | (-2.71;2.59) | 0.97 |
|  | Ambient PM10  (1-day mean) |  | 0.01 | (-0.22;0.23) | 0.96 |  | -0.14 | (-0.49;0.20) | 0.41 |  | 0.05 | (-0.29;0.38) | 0.77 |
|  | Ambient PM10  (2-day mean) |  | 0.10 | (-0.21;0.41) | 0.51 |  | -0.13 | (-0.61;0.36) | 0.60 |  | 0.19 | (-0.28;0.66) | 0.43 |
|  | Ambient PM10  (5-day mean) |  | 0.12 | (-0.38;0.61) | 0.64 |  | -0.24 | (-0.96;0.48) | 0.50 |  | 0.36 | (-0.38;1.10) | 0.33 |
|  | Ambient PM10  (8-day mean) |  | 0.22 | (-0.37;0.81) | 0.46 |  | -0.47 | (-1.33;0.39) | 0.28 |  | 0.79 | (-0.06;1.64) | 0.07 |
| **Heart rate (bpm)** | | | | | | | | | | | | | |
|  | Personal PM2.5 (work hours) |  | 0.15 | (-0.08;0.39) | 0.20 |  | 0.35 | (-0.06;0.75) | 0.09 |  | 0.00 | (-0.30;031) | 0.97 |
|  | Personal EC (work hours) |  | 1.03 | (-1.62;3.68) | 0.44 |  | 2.28 | (-1.60;6.17) | 0.24 |  | -2.91 | (-6.85;1.04) | 0.14 |
|  | Ambient PM10  (1-day mean) |  | 0.14 | (-0.19;0.48) | 0.40 |  | 0.42 | (-0.06;0.91) | 0.09 |  | -0.21 | (-0.75;0.34) | 0.44 |
|  | Ambient PM10  (2-day mean) |  | 0.23 | (-0.23;0.68) | 0.33 |  | 0.44 | (-0.22;1.11) | 0.19 |  | -0.36 | (-1.12;0.40) | 0.34 |
|  | Ambient PM10  (5-day mean) |  | 0.57 | (-0.14;1.29) | 0.12 |  | 0.82 | (-0.14;1.79) | 0.09 |  | -0.11 | (-1.31;1.10) | 0.86 |
|  | Ambient PM10  (8-day mean) |  | 0.67 | (-0.20;1.53) | 0.13 |  | 0.88 | (-0.33;2.10) | 0.15 |  | 0.03 | (-1.36;1.42) | 0.97 |

aAll analyses adjusted for age, sex, BMI, pack-years tea drinking during the study time, usual alcohol drinking, work hours/week, day of the week, and appropriate outdoor temperature (i.e., temperature averaged over the same time window as the air particle exposure variable). Analyses on all subjects are also adjusted for smoking status (current, ex, never) and number of cigarettes smoked during the study time. Analyses on current smokers are also adjusted for number of cigarettes smoked during the study time. bFor EC, results are estimated on 238 observations because of two missing values; for PM2.5, results are from 239 observations because of one missing value. cFor PM2.5 and EC exposures, results are estimated on 145 observations because of a missing value. dFor EC exposures, results are estimated on 93 observations because of a missing value.

**Table S2. Stratified analyses by current smoking on office workersa**

|  |  |  | **All Office Workers (obs=120b)** | | |  | **Current non-smoking office workers (obs=74c)** | | |  | **Current smoking office workers (obs=46d)** | | |
| --- | --- | --- | --- | --- | --- | --- | --- | --- | --- | --- | --- | --- | --- |
|  |  |  | β | (95%CI) | p-value |  | β | (95%CI) | p-value |  | β | (95%CI) | p-value |
|  |  |  |  |  |  |  |  |  |  |  |  |  |  |
| **Systolic blood pressure (mmHg)** | | | | | | | | | | | | | |
|  | Personal PM2.5 (work hours) |  | -0.06 | (-0.29;0.18) | 0.64 |  | -0.13 | (-0.60;0.35) | 0.59 |  | -0.03 | (-0.32;0.27) | 0.86 |
|  | Personal EC (work hours) |  | -2.54 | (-6.39;1.31) | 0.19 |  | -4.74 | (-10.37;0.89) | 0.10 |  | -5.72 | (-13.15;1.71) | 0.12 |
|  | Ambient PM10  (1-day mean) |  | 0.10 | (-0.26;0.46) | 0.57 |  | -0.25 | (-0.77;0.27) | 0.33 |  | 0.18 | (-0.32;0.67) | 0.46 |
|  | Ambient PM10  (2-day mean) |  | -0.05 | (-0.53;0.44) | 0.85 |  | -0.40 | (-1.09;0.29) | 0.25 |  | -0.12 | (-0.84;0.61) | 0.73 |
|  | Ambient PM10  (5-day mean) |  | 0.08 | (-0.80;0.95) | 0.86 |  | -0.26 | (-1.38;0.85) | 0.63 |  | -0.17 | (-1.59;1.25) | 0.80 |
|  | Ambient PM10  (8-day mean) |  | 0.53 | (-0.44;1.50) | 0.28 |  | -0.18 | (-1.44;1.08) | 0.77 |  | 0.36 | (-1.41;2.13) | 0.67 |
| **Diastolic blood pressure (mmHg)** | | | | | | | | | | | | | |
|  | Personal PM2.5 (work hours) |  | 0.00 | (-0.21;0.22) | 0.97 |  | -0.06 | (-0.52;0.40) | 0.79 |  | 0.04 | (-0.19;0.26) | 0.73 |
|  | Personal EC (work hours) |  | -4.52 | (-7.87;-1.16) | 0.01 |  | -4.69 | (-10.28;0.89) | 0.10 |  | -5.47 | (-10.89;-0.04) | 0.05 |
|  | Ambient PM10  (1-day mean) |  | 0.11 | (-0.21;0.43) | 0.49 |  | -0.04 | (-0.58;0.50) | 0.89 |  | 0.32 | (-0.37;1.02) | 0.34 |
|  | Ambient PM10  (2-day mean) |  | 0.06 | (-0.38;0.50) | 0.78 |  | 0.11 | (-0.60;0.82) | 0.75 |  | -0.01 | (-1.02;1.00) | 0.98 |
|  | Ambient PM10  (5-day mean) |  | 0.31 | (-0.43;1.06) | 0.40 |  | 0.74 | (-0.31;1.78) | 0.16 |  | 0.61 | (-1.41;2.62) | 0.53 |
|  | Ambient PM10  (8-day mean) |  | 0.83 | (0.02;1.64) | 0.04 |  | 1.39 | (0.22;2.56) | 0.02 |  | 1.60 | (-0.86;4.06) | 0.18 |
| **Mean arterial pressure (mmHg)** | | | | | | | | | | | | | |
|  | Personal PM2.5 (work hours) |  | -0.01 | (-0.19;0.18) | 0.95 |  | -0.07 | (-0.46;0.33) | 0.74 |  | 0.02 | (-0.19;0.23) | 0.84 |
|  | Personal EC (work hours) |  | -3.74 | (-6.70;-0.78) | 0.01 |  | -4.70 | (-9.37;-0.04) | 0.05 |  | -5.06 | (-10.22;0.10) | 0.05 |
|  | Ambient PM10  (1-day mean) |  | 0.12 | (-0.16;0.41) | 0.39 |  | -0.08 | (-0.54;0.38) | 0.73 |  | 0.23 | (-0.25;0.72) | 0.32 |
|  | Ambient PM10  (2-day mean) |  | 0.05 | (-0.34;0.44) | 0.81 |  | 0.00 | (-0.60;0.60) | 1.00 |  | -0.07 | (-0.79;0.65) | 0.84 |
|  | Ambient PM10  (5-day mean) |  | 0.27 | (-0.42;0.95) | 0.44 |  | 0.47 | (0.46;1.40) | 0.31 |  | 0.08 | (-1.34;1.51) | 0.90 |
|  | Ambient PM10  (8-day mean) |  | 0.74 | (0.00;1.48) | 0.05 |  | 0.90 | (-0.16;1.96) | 0.09 |  | 0.78 | (-0.97;2.54) | 0.35 |
| **Pulse pressure (mmHg)** | | | | | | | | | | | | | |
|  | Personal PM2.5 (work hours) |  | -0.06 | (-0.31;0.20) | 0.65 |  | -0.03 | (-0.52;0.47) | 0.91 |  | -0.07 | (-0.37;0.22) | 0.59 |
|  | Personal EC (work hours) |  | 2.69 | (-1.42;6.8) | 0.19 |  | 0.19 | (-6.14;6.53) | 0.95 |  | 0.15 | (-7.38;7.68) | 0.97 |
|  | Ambient PM10  (1-day mean) |  | -0.03 | (-0.40;0.33) | 0.86 |  | -0.18 | (-0.77;0.40) | 0.52 |  | 0.14 | (-0.49;0.76) | 0.65 |
|  | Ambient PM10  (2-day mean) |  | -0.10 | (-0.60;0.40) | 0.68 |  | -0.39 | (-1.18;0.40) | 0.32 |  | 0.10 | (-0.79;0.99) | 0.81 |
|  | Ambient PM10  (5-day mean) |  | -0.26 | (-1.13;0.60) | 0.54 |  | -0.93 | (-2.07;0.21) | 0.10 |  | 0.79 | (-0.96;2.54) | 0.35 |
|  | Ambient PM10  (8-day mean) |  | -0.38 | (-1.35;0.59) | 0.44 |  | -1.61 | (-2.84;-0.38) | 0.01 |  | 1.31 | (-0.86;3.48) | 0.22 |
| **Heart rate (bpm)** | | | | | | | | | | | | | |
|  | Personal PM2.5 (work hours) |  | 0.00 | (-0.31;0.30) | 0.97 |  | -0.03 | (-0.64;0.50) | 0.92 |  | 0.09 | (-0.30;0.47) | 0.63 |
|  | Personal EC (work hours) |  | -2.08 | (-6.94;2.79) | 0.40 |  | 1.28 | (-8.47;5.91) | 0.72 |  | 2.17 | (-6.56;10.91) | 0.60 |
|  | Ambient PM10  (1-day mean) |  | -0.03 | (-0.48;0.41) | 0.88 |  | 0.12 | (-0.56;0.80) | 0.71 |  | -0.39 | (-1.15;0.36) | 0.28 |
|  | Ambient PM10  (2-day mean) |  | -0.14 | (-0.73;0.46) | 0.64 |  | -0.26 | (-1.15;0.63) | 0.55 |  | -0.16 | (-1.25;0.92) | 0.75 |
|  | Ambient PM10  (5-day mean) |  | -0.13 | (-1.14;0.89) | 0.81 |  | -0.05 | (-1.39;1.30) | 0.94 |  | 0.13 | (-1.81;2.07) | 0.89 |
|  | Ambient PM10  (8-day mean) |  | -0.44 | (-1.59;0.71) | 0.45 |  | -0.30 | (-1.90;1.30) | 0.70 |  | -0.92 | (-3.31;1.47) | 0.42 |

aAdjusted for age, sex, BMI, pack-years, tea drinking during the study time, usual alcohol drinking, work hours/week, day of the week, and appropriate outdoor temperature (i.e., temperature averaged over the same time window as the air particle exposure variable). Analyses on all subjects are also adjusted for smoking status (current, ex, never) and number of cigarettes smoked during the study time. Analyses on current smokers are also adjusted for number of cigarettes smoked during the study time. bFor EC exposure, results are estimated on 119 observations because of two missing values. cFor EC, results are estimated on 73 observations because of a missing values. dFor EC, results are estimated on 45 observations because of a missing value.

**Table S3. Stratified analyses by current smoking on truck driversa**

|  |  |  | **All truck drivers (obs=120b)** | | |  | **Current non-smoking truck drivers (obs=72c)** | | |  | **Current smoking truck drivers (obs=48)** | | |
| --- | --- | --- | --- | --- | --- | --- | --- | --- | --- | --- | --- | --- | --- |
|  |  |  | β | (95%CI) | p-value |  | β | (95%CI) | p-value |  | β | (95%CI) | p-value |
|  |  |  |  |  |  |  |  |  |  |  |  |  |  |
| **Systolic blood pressure (mmHg)** | | | | | | | | | | | | | |
|  | Personal PM2.5 (work hours) |  | 0.15 | (-0.16;0.46) | 0.33 |  | 0.29 | (-0.34;0.93) | 0.35 |  | 0.16 | (-0.31;0.62) | 0.48 |
|  | Personal EC (work hours) |  | 1.23 | (-1.53;3.99) | 0.38 |  | 0.77 | (-3.75;5.28) | 0.73 |  | 1.23 | (-3.18;5.65) | 0.56 |
|  | Ambient PM10  (1-day mean) |  | 0.24 | (-0.13;0.60) | 0.20 |  | 0.14 | (-0.40;0.68) | 0.60 |  | 0.22 | (-0.19;0.62) | 0.27 |
|  | Ambient PM10  (2-day mean) |  | 0.47 | (-0.04;0.97) | 0.07 |  | 0.23 | (-0.55;1.01) | 0.55 |  | 0.19 | (-0.44;0.83) | 0.53 |
|  | Ambient PM10  (5-day mean) |  | 0.97 | (0.15;1.78) | 0.02 |  | 0.20 | (-1.07;1.46) | 0.75 |  | 0.99 | (0.13;1.84) | 0.03 |
|  | Ambient PM10  (8-day mean) |  | 1.31 | (0.32;2.31) | 0.01 |  | 0.61 | (-0.98;2.20) | 0.44 |  | 0.51 | (-0.49;1.50) | 0.29 |
| **Diastolic blood pressure (mmHg)** | | | | | | | | | | | | | |
|  | Personal PM2.5 (work hours) |  | 0.09 | (-0.14;0.33) | 0.42 |  | 0.30 | (-0.16;0.76) | 0.19 |  | 0.16 | (-0.16;0.48) | 0.31 |
|  | Personal EC (work hours) |  | 0.23 | (-1.84;2.3) | 0.83 |  | 0.34 | (-2.98;-3.66) | 0.83 |  | 0.29 | (-2.94;3.52) | 0.85 |
|  | Ambient PM10  (1-day mean) |  | 0.24 | (-0.03;0.51) | 0.08 |  | 0.31 | (-0.08;0.70) | 0.12 |  | 0.03 | (-0.56;0.62) | 0.92 |
|  | Ambient PM10  (2-day mean) |  | 0.15 | (-0.22;0.53) | 0.42 |  | 0.11 | (-0.45;0.67) | 0.69 |  | 0.21 | (-0.70;1.11) | 0.63 |
|  | Ambient PM10  (5-day mean) |  | 0.34 | (-0.29;0.97) | 0.28 |  | -0.58 | (-1.47;0.31) | 0.19 |  | 1.08 | (-0.21;2.37) | 0.09 |
|  | Ambient PM10  (8-day mean) |  | 0.07 | (-0.72;0.87) | 0.86 |  | -0.74 | (-1.89;0.40) | 0.19 |  | 1.24 | (-0.23;2.71) | 0.09 |
| **Mean arterial pressure (mmHg)** | | | | | | | | | | | | | |
|  | Personal PM2.5 (work hours) |  | 0.12 | (-0.11;0.35) | 0.30 |  | 0.29 | (-0.17;0.75) | 0.21 |  | 0.16 | (-0.17;0.48) | 0.32 |
|  | Personal EC (work hours) |  | 0.51 | (-1.55;2.57) | 0.62 |  | 0.31 | (-3.01;-3.62) | 0.85 |  | 0.58 | (-2.64;3.80) | 0.70 |
|  | Ambient PM10  (1-day mean) |  | 0.25 | (-0.02;0.51) | 0.07 |  | 0.26 | (-0.12;0.65) | 0.17 |  | 0.16 | (-0.26;0.57) | 0.44 |
|  | Ambient PM10  (2-day mean) |  | 0.25 | (-0.13;0.62) | 0.19 |  | 0.12 | (-0.43;0.67) | 0.65 |  | 0.20 | (-0.45;0.84) | 0.53 |
|  | Ambient PM10  (5-day mean) |  | 0.56 | (-0.05;1.17) | 0.07 |  | -0.35 | (-1.24;0.53) | 0.42 |  | 1.06 | (0.22;1.91) | 0.02 |
|  | Ambient PM10  (8-day mean) |  | 0.48 | (-0.29;1.26) | 0.22 |  | -0.31 | (-1.46;0.85) | 0.59 |  | 0.79 | (-0.21;1.80) | 0.11 |
| **Pulse pressure (mmHg)** | | | | | | | | | | | | | |
|  | Personal PM2.5 (work hours) |  | 0.06 | (-0.20;0.31) | 0.65 |  | 0.17 | (-0.34;0.69) | 0.50 |  | 0.23 | (-0.17;0.63) | 0.24 |
|  | Personal EC (work hours) |  | 0.98 | (-1.18;3.14) | 0.37 |  | 1.38 | (-2.22;4.97) | 0.44 |  | 2.17 | (-1.14;5.48) | 0.18 |
|  | Ambient PM10  (1-day mean) |  | 0.02 | (-0.28;0.32) | 0.90 |  | -0.16 | (-0.61;0.29) | 0.47 |  | -0.11 | (-0.61;0.40) | 0.66 |
|  | Ambient PM10  (2-day mean) |  | 0.33 | (-0.08;0.75) | 0.11 |  | 0.15 | (-0.52;0.83) | 0.64 |  | 0.26 | (-0.49;1.01) | 0.47 |
|  | Ambient PM10  (5-day mean) |  | 0.56 | (-0.13;1.26) | 0.11 |  | 0.71 | (-0.34;1.76) | 0.18 |  | 0.16 | (-1.06;1.39) | 0.78 |
|  | Ambient PM10  (8-day mean) |  | 1.08 | (0.27;1.89) | 0.01 |  | 1.18 | (-0.08;2.45) | 0.07 |  | 0.67 | (-0.62;1.95) | 0.28 |
| **Heart rate (bpm)** | | | | | | | | | | | | | |
|  | Personal PM2.5 (work hours) |  | 0.30 | (-0.14;0.74) | 0.18 |  | 0.37 | (-0.45;1.19) | 0.36 |  | 0.16 | (-0.51;0.83) | 0.61 |
|  | Personal EC (work hours) |  | 2.19 | (-1.52;5.89) | 0.24 |  | 1.75 | (-3.82;7.32) | 0.52 |  | -0.11 | (-6.11;5.89) | 0.97 |
|  | Ambient PM10  (1-day mean) |  | 0.29 | (-0.23;0.81) | 0.27 |  | 0.38 | (-0.35;1.12) | 0.29 |  | -0.15 | (-1.05;0.75) | 0.73 |
|  | Ambient PM10  (2-day mean) |  | 0.61 | (-0.13;1.35) | 0.10 |  | 0.40 | (-0.73;1.53) | 0.47 |  | -0.30 | (-1.62;1.01) | 0.63 |
|  | Ambient PM10  (5-day mean) |  | 1.20 | (-0.02;2.42) | 0.05 |  | 1.09 | (-0.68;2.86) | 0.22 |  | 0.28 | (-1.82;2.38) | 0.78 |
|  | Ambient PM10  (8-day mean) |  | 1.69 | (0.27;3.12) | 0.02 |  | 1.40 | (-0.78;3.59) | 0.20 |  | 0.77 | (-1.47;3.01) | 0.47 |

aAdjusted for age, sex, BMI, pack-years, number of cigarettes smoked and tea drinking during the study time, usual alcohol drinking, work hours/week, day of the week, and appropriate outdoor temperature (i.e., temperature averaged over the same time window as the air particle exposure variable). Analyses on all subjects are also adjusted for smoking status (current, ex, never) and number of cigarettes smoked during the study time. Analyses on current smokers are also adjusted for number of cigarettes smoked during the study time. bFor PM2.5 and EC exposures, results are estimated on 119 observations because of a missing value. cFor PM2.5, results are from 71 observations because of a missing value.
